# Supplementary material
Source: PubMed Central journal article supplement (PMC3523390)
Supplement: NIHMS29456-supplement-Supporting.pdf [file NIHMS29456-supplement-Supporting.pdf]

**Computer-aided discovery, validation and mechanistic characterisation of novel neolignan activators of PPAR $\gamma$** 

Nanang Fakhrudini,<sup>2</sup> Angela Ladurner<sup>1</sup>, Atanas G. Atanasov, Elke H. Heiss, Lisa Baumgartner, Patrick Markt, Daniela Schuster, Ernst P. Ellmerer, Gerhard Wolber, Judith M. Rollinger, Hermann Stuppner, Verena M. Dirsch

**Compounds identification**

NMR spectra were recorded on a BRUKER Avance300 spectrometer operating at 300MHz (<sup>1</sup>H) and 75MHz (<sup>13</sup>C) respectively using CDCl<sub>3</sub> as solvent. Chemical shifts are given in  $\delta$ -values [ppm] referenced to the solvent ( $\delta$ =7.26 and 77.16 respectively). Assignments are based on HSQC (edited), HMBC and COSY spectra. HRMS data were recorded on a Bruker MicrOTOF QII.

**Dieugenol**

<sup>1</sup>H-NMR (300 MHz, CDCl<sub>3</sub>,  $\delta$ , ppm): 6.759, 2H, d, J=1.9, H-6; 6.731, 2H, d, J=1.9, H-4; 6.025, 2H, s, HO; 5.987, 2H, m, H-8; 5.118 and 5.071, 4H, m, H<sub>2</sub>C(9); 3.371, 6H, s, H<sub>3</sub>CO; 3.371, 4H, br d, J=6.7, H<sub>2</sub>C(7).

<sup>13</sup>C-NMR (75 MHz, CDCl<sub>3</sub>,  $\delta$ , ppm): 147.3, s, C(3); 141.02, s, C(2); 137.78, d, C(8); 132.05, s, C(5); 124.52, s, C(1); 123.23, d, C(6); 115.86, t, C(9); 110.80, d, C(4); 56.21, q, CH<sub>3</sub>O; 40,11, t, C(7) (Ogata et al., 2005).

HR ESIMS (neg. modus):  $m/z$  325.15036 [M-H]<sup>-</sup> (calculated for C<sub>20</sub>H<sub>21</sub>O<sub>4</sub><sup>-</sup> 325.14453); (pos. modus):  $m/z$  349.13566 [M+Na]<sup>+</sup> (calculated for C<sub>20</sub>H<sub>22</sub>NaO<sub>4</sub><sup>+</sup> 349.14103).

**Tetrahydrodieugenol**

<sup>1</sup>H-NMR (300 MHz, CDCl<sub>3</sub>,  $\delta$ , ppm): 6.754, 2H, d, J=2.0, H-6; 6.730, 2H, d, J=1.9, H-4; 6.026, 2H, s, HO; 3.923, 6H, s, H<sub>3</sub>CO; 2.569, 4H, t, J=7.7, H<sub>2</sub>C(7); 1.660, 4H, m, H<sub>2</sub>C(8); 0.968, 6H, t, J=7.3, H<sub>3</sub>C(9).

<sup>13</sup>C-NMR (75 MHz, CDCl<sub>3</sub>,  $\delta$ , ppm): 147.27, s, C(3); 140.68, s, C(2); 134.80, d, C(5); 124.61, s, C(1); 123.13, d, C(6); 110.81, d, C(4); 56.22, q, CH<sub>3</sub>O; 38.02, t, C(7); 24.89, t, C(8); 14.02, q, C(9).

HR ESIMS (neg. modus):  $m/z$  329.18312  $[M-H]^-$  (calculated for  $C_{20}H_{25}O_4^-$  329.17583); (pos. modus):  $m/z$  353.16211  $[M+Na]^+$  (calculated for  $C_{20}H_{26}NaO_4^+$  353.17233);  $m/z$  683.33093  $[2M+Na]^+$  (calculated for  $C_{40}H_{52}NaO_8^+$  683.35544).

## Magnolol

$^1H$ -NMR (300 MHz,  $CDCl_3$ ,  $\delta$ , ppm): 7.134, 2H, dd,  $J=8.2$ ,  $J=2.1$ , H-4; 7.085, 2H, d,  $J=1.9$ , H-6; 6.952, 2H, d,  $J=8.2$ , H-3; 5.973, 2H, tdd,  $J=16.8$ ,  $J=10.0$ ,  $J=6.7$ , H-8; 5.557, 2H, s, OH; 5.094, 4H, m,  $H_2C(9)$ ; 3.372, 4H, d,  $J=6.7$ , H-7.

$^{13}C$ -NMR (75 MHz,  $CDCl_3$ ,  $\delta$ , ppm): 151.12, s, C(2); 137.48, s, C(8); 133.21, s, C(5); 131.18, s, C(6); 129.97, s, C(4); 123.70, s, C(1); 116.64, s, C(3); 115.81, s, C(9); 39.32, s, C(7). (Yahara et al., 1991)

HR ESIMS (neg. modus):  $m/z$  265.13150  $[M-H]^-$  (calculated for  $C_{18}H_{17}O_2^-$  265.12340); (pos. modus):  $m/z$  289.11387  $[M+Na]^+$  (calculated for  $C_{18}H_{18}NaO_2^+$  289.11990).

## References

Ogata M, Tutumimoto Sato K, Kunikane T, Oka K, Seki M, Urano S, Hiramatsu K and Endo T (2005)

Antibacterial activity of dipropofol and related compounds. *Biol Pharm Bull* **28**:1120-2.

Yahara S, Nishiyori T, Kohda A, Nohara T and Nishioka I (1991) Isolation and characterization of phenolic compounds from magnoliae cortex produced in China. *Chem Pharm Bull* **39**:2024-2036.
